# Supplementary material for: Distribution and Diversity of Macrophytes in Relation to Some Physico-Chemical Factors in the Ketar River, Ziway Catchment, Ethiopia
Source: Research Square preprint supplement (doi:10.21203/rs.3.rs-629396/v1), 2021-06-28
Supplement: Supplementary file 1 [file 386d02160ea24f75eeb2597f.xlsx]

## Sheet: Sheet1
Sites	Quad	Months	Pistia stratiotes	Nymphoides peltata	Persicaria senegalensis	Ludwigia stolonifera	Antheranthera sessilis	Ipomoea aquatic	Azolla nilotica	Cyperus papyrus	Typha latifolia	Echinochloa stagnina	Limnocharis flava	Asteracantha longofolia	Commelina latifolia	Cyperus dives	Nymphaea lotus	Phragmites australis
Site a	quad 1		0	0	40	0	9	0	167	0	0	8	0	0	0	0	0	0
	Quad 2		0	0	18	0	0	0	132	0	0	2	0	0	0	0	0	0
			0	0	29	0	4.5	0	149.5	0	0	5	0	0	0	0	0	0
Site 2	quad 1	Dec,2017	0	0	10	0	0	3	87	0	0	16	0	0	0	30	0	0
	Quad 2		0	0	17	0	0	8	0	0	0	37	0	0	0	8	0	0
Site 3	quad 1		201	29	0	69	0	0	0	0	0	0	0	0	0	17	0	0
	Quad 2		37	57	10	39	0	0	0	5	6	0	0	0	18	0	0	0
	Quad 3		33	98	0	72	0	0	0	0	0	0	0	0	0	0	0	0
			90.3333	61.3333	3.33333	60	0	0	0	1.66667	2	0	0	0	6	5.66667	0	0
Site 1	Quad 2		0	0	16	0	9	0	0	0	0	9	0	0	0	0	0	0
Site 2	quad 1	Jan,2018	0	0	27	9	0	0	255	0	0	7	0	0	0	4	0	0
	Quad 2		0	0	14	17	0	0	265	0	0	11	0	0	0	9	0	0
Site 3	quad 1		243	17	0	93	0	0	0	6	5	15	0	0	0	3	0	0
	Quad 2		86	67	4	64	0	0	0	0	3	11	0	0	12	1	0	0
	Quad 3		77	11	11	19	0	0	0	0	0	14	0	0	17	0	0	0
Site 1	Quad 1		0	0	16	0	8	0	234	0	0	0	2	2	29	0	2	0
Site 2	Quad 1	Feb,2018	0	0	25	8	0	3	265	0	0	2	0	3	0	4	0	0
	Quad 2		0	12	13	16	0	8	221	0	0	11	1	0	0	9	0	0
			0	6	19	12	0	5.5	243	0	0	6.5	0.5	1.5	0	6.5	0	0
Site 3	Quad 1		243	19	22	96	0	2	0	6	3	13	0	0	5	3	0	0
	Quad 2		84	26	13	67	0	0	0	0	3	14	0	0	23	1	0	0
	Quad 3		80	15	0	21	0	0	0	0	0	20	0	0	10	0	0	0
Site 1	Q 1		0	0	21	0	17	2	289	0	0	18	2	3	17	0	2	0
Site 2	quad 1		0	0	4	27	4	14	276	0	0	21	0	3	0	3	0	0
	Quad 2	Mar,2018	0	17	18	13	0	17	231	0	0	13	1	0	0	1	0	0
Site 3	q1		181	57	10	0	0	0	211	0	0	0	0	0	13	0	0	0
	q2		268	13	6	0	0	0	357	0	0	0	0	0	7	0	0	0
	q3		284	0	0	0	0	0	355	0	0	0	0	0	0	0	0	0
			244.333	23.3333	5.33333	0	0	0	307.667	0	0	0	0	0	6.66667	0	0	0
Site 1	q1		0	0	24	0	15	2	231	0	0	36	4	3	0	0	8	0
Site 2	quad 1	Apr,2018	0	0	17	23	2	36	367	0	0	7	0	2	0	0	0	0
	Quad 2		0	0	0	0	0	33	411	0	0	27	1	0	0	2	0	0
Site 3	q1		7	88	0	46	0	0	0	7	2	0	0	0	0	4	0	0
	q2		93	67	17	62	0	0	0	4	1	0	0	0	15	0	0	0
	q3		329	11	0	0	0	0	0	1	0	0	0	0	0	0	0	0
Site 1	q1	May,2018	0	0	3	0	13	1	133	0	0	31	5	3	0	0	3	0
	q2		0	0	19	0	5	4	143	0	0	9	0	2	0	0	9	0
Site 2	q1		0	0	15	5	0	36	322	0	0	22	3	0	0	2	0	0
	q2		0	15	0	22	0	33	311	0	0	32	0	0	0	5	0	0
Site 3	Q1		176	49	4	2	0	0	0	0	0	0	0	0	4	2	0	2
	Q2		129	43	6	0	0	0	0	0	0	0	0	0	0	0	0	0
	Q3		433	0	0	0	0	0	0	0	0	0	0	0	0	0	0	0
Site 1	q1		0	7	0	0	11	0	0	0	0	6	3	0	2	0	0	0
	q2		0	13	10	0	5	0	0	0	0	36	1	0	0	0	7	0
Site 2	q1	Oct,2018	0	0	6	0	0	15	0	0	0	29	0	0	0	0	0	0
	q2		0	0	3	0	0	17	0	0	0	26	0	0	0	6	0	0
Site 3	q1		64	37	6	31	0	0	0	7	2	19	0	0	0	7	0	0
	q2		46	21	23	65	0	0	0	3	0	18	0	0	0	3	0	0
Site 1	q1		0	0	0	0	2	0	0	0	0	0	0	0	0	0	0	0
Site 2	q1		0	26	2	13	3	3	0	0	0	33	0	2	0	0	0	0
	q2	Nov,2018	0	0	0	6	0	5	0	0	0	23	0	0	0	0	0	0
Site 3	q1		0	26	3	43	0	0	0	3	0	12	0	0	0	4	0	0
	q2		65	21	17	34	0	0	0	2	2	16	0	0	0	0	0	2
	q3		132	18	8	98	0	0	0	1	0	0	0	0	0	0	0	5
	q4		124	9	0	74	0	0	0	0	0	0	0	0	0	0	0	0
		Total	3415	889	498	1154	103	242	5263	45	27	624	23	23	172	128	31	9
		No. quad/51	23/51	28/51	37/51	29/51	13/51	19/51	21/51	1900-01-11	1900-01-11	35/51	1951-10-01	1951-09-01		1900-01-22
		N.Quad	23	28	37	29	13	19	21	11	11	35	10	9	13	22	6	3
		Freq	45.098	54.902	72.549	56.8627	25.4902	37.2549	41.1765	21.5686	21.5686	68.6275	19.6078	17.6471	25.4902	43.1373	11.7647	5.88235	568.627
		Density	66.9608	17.4314	9.76471	22.6275	2.01961	4.7451	103.196	0.882353	0.529412	12.2353	0.45098	0.45098	3.37255	2.5098	0.607843	0.176471	247.961
		Abundance	148.478	31.75	13.4595	39.7931	7.92308	12.7368	250.619	4.09091	2.45455	17.8286	2.3	2.55556	13.2308	5.81818	5.16667	3	561.205
		Rel.freq	7.93103	9.65517	12.7586	10	4.48276	6.55172	7.24138	3.7931	3.7931	12.069	3.44828	3.10345	4.48276	7.58621	2.06897	1.03448
		Rel. Densi	27.0046	7.02989	3.938	9.12542	0.814487	1.91365	41.6179	0.355844	0.213506	4.93437	0.181876	0.181876	1.36011	1.01218	0.245137	0.0711687
		Rel.Abunda	26.457	5.65747	2.39831	7.09065	1.4118	2.26955	44.6573	0.728951	0.437371	3.17684	0.409832	0.455369	2.35756	1.03673	0.920638	0.534564

## Sheet: Sheet2
	Site 1	Site 2	Site 3
Taxa_S	10	10	12		Result of PAST
Individuals	264	363	597
Dominance_D	0.4904	0.5632	0.3367
Simpson_1-D	0.5096	0.4368	0.6633
Shannon_H	1.229	1.072	1.462
Evenness_e^H/S	0.3419	0.2921	0.3596
Brillouin	1.079	0.9427	1.391
Menhinick	0.6106	0.5212	0.4899
Margalef	1.614	1.527	1.721
Equitability_J	0.5339	0.4655	0.5884
Fisher_alpha	2.048	1.896	2.125
Berger-Parker	0.686	0.7416	0.5116
Chao-1	10	10	12

## Sheet: Sheet3
	Site 1	Site 2	Site 3
pH	7.84	7.95	8.11	Physico-chemical parameters
Temp	20.4	20.6	20.9
EC	202.7	202	213.4
DO	5.44	5.4	6.24
NO2	0.11	0.17	0.16
NO3	0.22	0.28	0.22
NH4	0.7	0.66	0.66
TP	0.66	0.55	0.43
TSS	298.7	286.1	232.3
